# Supplementary material for: Opportunities for Savings in Risk Arrangements for Oncologic Care
Source: PubMed Central journal article supplement (PMC10504611; doi:10.1001/jamahealthforum.2023.3124), 2023-09-15
Supplement: jamahealthforum-e233124-s002.pdf [file jamahealthforum-e233124-s002.pdf]

## **Data Sharing Statement**

Landon. Opportunities for Savings in Risk Arrangements for Oncologic Care. *JAMA Health Forum*. Published September 15, 2023. doi:10.1001/jamahealthforum.2023.3124

### **Data**

**Data available:** No
